# Supplementary material for: A new filtration system for extraction and accurate quantification of microplastics
Source: Royal Society of Chemistry journal article supplement (doi:10.1039/d4ay01276c), 2024-01-01
Supplement: d4ay01276c1.pdf [file d4ay01276c1.pdf]

(Supplementary Material)

## A new filtration system for extraction and accurate quantification of microplastics

JuHye Kim,<sup>†a</sup> Jihye Kwon,<sup>†a</sup> JeongHyun Kwon,<sup>a</sup> Muhammad Zain Siddiqui,<sup>a</sup>  
Gijeong Woo,<sup>a</sup> Mijung Choi,<sup>b</sup> Sungguan Hong,<sup>c</sup> Chuan Ma,<sup>d</sup> Shogo Kumagai,<sup>ef</sup>  
Atsushi Watanabe,<sup>eg</sup> Norio Teramae,<sup>gh</sup> Su Shiung Lam<sup>i</sup> and Young-Min Kim<sup>\*a</sup>

<sup>a</sup>*Department of Environmental Engineering, Daegu University, Gyeongsan 38453, Republic of Korea*

<sup>b</sup>*Korea Testing Certification Institute, Gunpo 15809, Republic of Korea*

<sup>c</sup>*Department of Chemistry, Chung-Ang University, Seoul 06974, Republic of Korea*

<sup>d</sup>*Key Laboratory of Low-Grade Energy Utilization Technologies and Systems, Ministry of Education,  
School of Energy and Power Engineering, Chongqing University, Chongqing 400044, China*

<sup>e</sup>*Graduate School of Environmental Studies, Tohoku University, 6-6-07 Aoba, Aramaki-aza, Aoba-ku,  
Sendai, Miyagi 980-8579, Japan*

<sup>f</sup>*Division for the Establishment of Frontier Sciences of Organization for Advanced Studies, Tohoku  
University, 2-1-1 Katahira, Aoba-ku, Sendai 980-8577, Japan*

<sup>g</sup>*Frontier Laboratories Ltd., 4-16-02, Saikon, Koriyama, Fukushima 963-8862, Japan*

<sup>h</sup>*Department of Chemistry, Graduate School of Science, Tohoku University, Aoba-ku, Sendai, Miyagi  
980-8578, Japan*

<sup>i</sup>*Higher Institution Centre of Excellence (HiCoE), Institute of Tropical Aquaculture and Fisheries  
(AKUATROP), Universiti Malaysia Terengganu, 21030 Kuala Nerus, Terengganu, Malaysia*

\* Corresponding authors: E-mail address: [y mk@daegu.ac.kr](mailto:y mk@daegu.ac.kr) (Y.-M., Kim);

<sup>†</sup> Shared first authors.

### <Discussion for the limitation of MFS on its use for high matrix sample>

Figure S1 illustrates the results of filtering a sample pretreated with H<sub>2</sub>O<sub>2</sub> and density-separated using MFS, including both a microscopic image of the filter section and Py-GC/MS analysis results. For samples containing substantial amounts of biomass, such as cotton dust, which are inadequately pretreated with hydrogen peroxide, the bottom surface of the filter becomes clogged, leading to a significant increase in the liquid level during the filtering process. Py-GC/MS analysis also reveals a large number of peaks, including a prominent peak for levoglucosan, a cellulose degradation product, in addition to microplastics (Fig. S1(b)). In contrast, for samples with proper pretreatment using H<sub>2</sub>O<sub>2</sub> and density separation, MFS enables smooth recovery of microplastics, with the levoglucosan peak visible but with clear observation of microplastic degradation products in the Py-GC/MS analysis (Fig. S1(b)). This underscores the importance of thorough organic matter removal and density separation when using MFS, although it is also crucial for CFS.

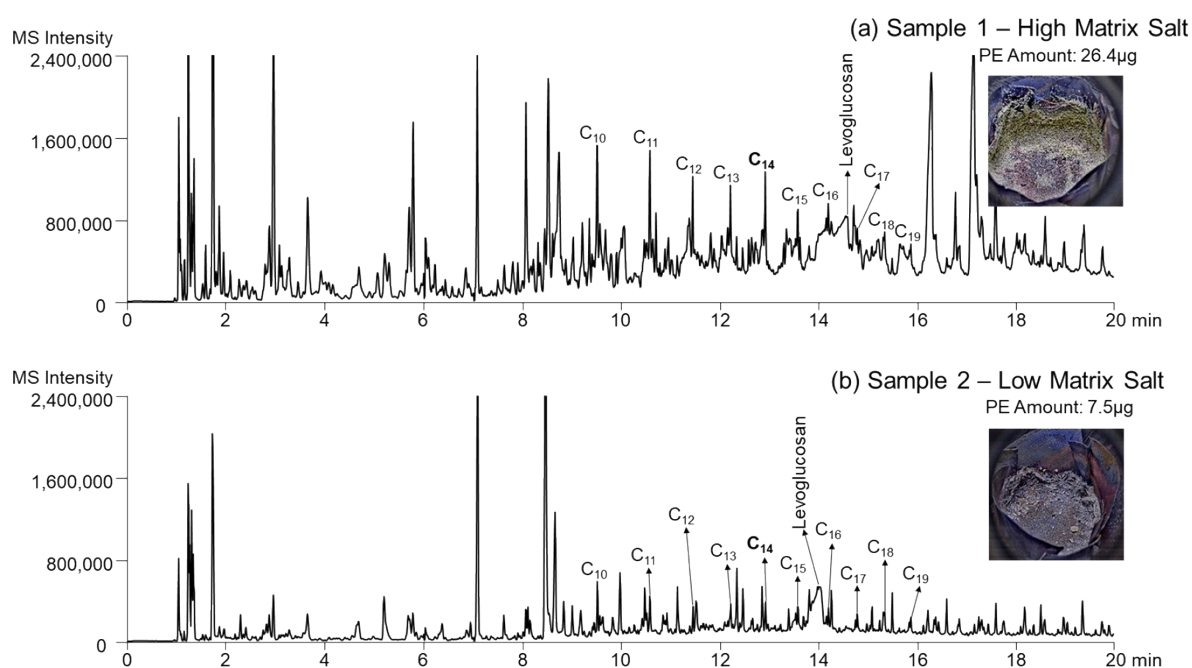

Fig S1. The MFS high and low matrix salt filters during the pre-processing step.
